# Supplementary material for: Evaluation of full-length nanopore 16S sequencing for detection of pathogens in microbial keratitis
Source: PeerJ. 2021 Feb 15;9:e10778. doi: 10.7717/peerj.10778 (PMC7891086; doi:10.7717/peerj.10778)
Supplement: Supplemental Information 6 [file peerj-09-10778-s006.xlsx]

## Sheet: Sheet1
Sample ID	Run ID	Mean read length	Mean read quality	Median read length	Median read quality	Number of reads	Read length N50	Total bases	Number, percentage and megabases of reads above quality cutoffs	>Q5	>Q7	>Q10	>Q12	>Q15
PC		1516	10.7	1602	11.2	121208	1605	183755698		119941 (99.0%) 181.8Mb	111744 (92.2%) 170.2Mb	82404 (68.0%) 128.5Mb	41288 (34.1%) 65.4Mb	216 (0.2%) 0.3Mb
SugiSpear		1502.7	10.6	1590	11.1	200662	1593	301542262		197153 (98.3%) 295.8Mb	180876 (90.1%) 273.0Mb	131498 (65.5%) 203.7Mb	63528 (31.7%) 99.8Mb	402 (0.2%) 0.6Mb
MW1021 Dryswab™ Rayon		1486.8	10.5	1592	11	14257	1595	21197392		14036 (98.4%) 20.9Mb	12897 (90.5%) 19.4Mb	9160 (64.2%) 14.3Mb	4317 (30.3%) 6.8Mb	24 (0.2%) 0.0Mb
Isohelix SK-2S		1534.8	10.6	1598	10.8	558523	1599	857199453		556559 (99.6%) 854.1Mb	528539 (94.6%) 813.0Mb	365780 (65.5%) 571.8Mb	145285 (26.0%) 229.0Mb	765 (0.1%) 1.2Mb
MW1021D Dryswab™ Polyester		1487.4	10.6	1591	11	29070	1594	43238660		28636 (98.5%) 42.7Mb	26308 (90.5%) 39.9Mb	19069 (65.6%) 29.7Mb	9035 (31.1%) 14.3Mb	55 (0.2%) 0.1Mb
MW1041 Cotton		1428	10.5	1585	10.9	218469	1590	311971580		215918 (98.8%) 308.2Mb	200503 (91.8%) 288.0Mb	140034 (64.1%) 209.1Mb	60843 (27.8%) 93.4Mb	249 (0.1%) 0.4Mb
MW130 Hospiswab™ Albumin		1395.3	10.5	1583	10.9	312097	1589	435467780		308953 (99.0%) 430.9Mb	287398 (92.1%) 403.8Mb	199893 (64.0%) 293.4Mb	86034 (27.6%) 130.5Mb	391 (0.1%) 0.6Mb
Patient A affected eye		1479.9	9.9	1576	10.1	628025	1579	929385000		621727 (99.0%) 920.0Mb	577206 (91.9%) 857.6Mb	323193 (51.5%) 492.0Mb	90530 (14.4%) 140.0Mb	413 (0.1%) 0.6Mb
Patient A unaffected eye		611.3	8.9	433	9	261	908	159556		246 (94.3%) 0.2Mb	202 (77.4%) 0.1Mb	96 (36.8%) 0.1Mb	23 (8.8%) 0.0Mb	0 (0.0%) 0.0Mb
Patient A negative control swab		956.6	7	1279	6.5	45	1570	43049		33 (73.3%) 0.0Mb	21 (46.7%) 0.0Mb	6 (13.3%) 0.0Mb	1 (2.2%) 0.0Mb	0 (0.0%) 0.0Mb
Patient B affected eye		735.6	8.9	423	9	416084	1561	306084871		410907 (98.8%) 302.9Mb	355434 (85.4%) 266.4Mb	106991 (25.7%) 100.8Mb	6804 (1.6%) 11.2Mb	11 (0.0%) 0.0Mb
Patient B unaffected eye		1531.3	9.2	1590	9.4	1385	1591	2120789		1369 (98.8%) 2.1Mb	1182 (85.3%) 1.8Mb	513 (37.0%) 0.8Mb	54 (3.9%) 0.1Mb	0 (0.0%) 0.0Mb
Patient B negative control		933.4	7.7	870	7.8	13	1578	12134		12 (92.3%) 0.0Mb	8 (61.5%) 0.0Mb	2 (15.4%) 0.0Mb	0 (0.0%) 0.0Mb	0 (0.0%) 0.0Mb
