# Supplementary material for: Evaluation of full-length nanopore 16S sequencing for detection of pathogens in microbial keratitis
Source: PeerJ. 2021 Feb 15;9:e10778. doi: 10.7717/peerj.10778 (PMC7891086; doi:10.7717/peerj.10778)
Supplement: Supplemental Information 7 [file peerj-09-10778-s007.xlsx]

## Sheet: LL 20191102 16S Eubacteria Gene
Experiment: LL 20191102 16S Eubacteria GeneSig nanopore swabs Selected Filter: 465-510 (465-510)
Include	Color	Pos	Name	Cp	Concentration	Standard	Status
TRUE	128	A1	A1	15.05	2090000	2000000
TRUE	128	A2	A1	15.23	1870000	2000000
TRUE	128	A3	A1	15.12	2000000	2000000
TRUE	128	C1	C1	18.95	200000	200000
TRUE	128	C2	C1	19.02	192000	200000
TRUE	128	C3	C1	18.9	207000	200000
TRUE	128	E1	E1	22.39	21100	20000
TRUE	128	E2	E1	22.32	22200	20000
TRUE	128	E3	E1	22.24	23500	20000
TRUE	128	G1	G1	25.73	1670	2000
TRUE	128	G2	G1	25.88	1480	2000
TRUE	128	G3	G1	25.51	1980	2000
TRUE	128	I1	I1	29.25	78.3	200
TRUE	128	I2	I1	29.26	77.9	200
TRUE	128	I3	I1	29.05	94.7	200
TRUE	255	M19	Isohelix Swab 37	14.19	3480000	0	E - Extrapolated concentration in standard curve
TRUE	255	M20	Isohelix Swab 37	14.17	3530000	0	E - Extrapolated concentration in standard curve
TRUE	255	M21	Isohelix Swab 37	14.21	3460000	0	E - Extrapolated concentration in standard curve
TRUE	128	K1	K1	32.11	4.91	20
TRUE	128	K2	K1	33.33	1.4	20
TRUE	128	K3	K1	31.49	9.19	20
TRUE	128	M1	M1	30.23	31.4	2
TRUE	128	M2	M1	30.96	15.5	2
TRUE	128	M3	M1	25.92	1430	2
TRUE	255	K19	MW1021 Rayon (Swab 36)	13.51	5250000	0	E - Extrapolated concentration in standard curve
TRUE	255	K20	MW1021 Rayon (Swab 36)	13.55	5140000	0	E - Extrapolated concentration in standard curve
TRUE	255	K21	MW1021 Rayon (Swab 36)	13.52	5210000	0	E - Extrapolated concentration in standard curve
TRUE	255	G19	MW1021D (Swab 27)	15.08	2050000	0	E - Extrapolated concentration in standard curve
TRUE	255	G20	MW1021D (Swab 27)	15.07	2060000	0	E - Extrapolated concentration in standard curve
TRUE	255	G21	MW1021D (Swab 27)	14.93	2240000	0	E - Extrapolated concentration in standard curve
TRUE	255	E19	MW1041 Cotton (Swab 12)	8.89	84300000	0	E - Extrapolated concentration in standard curve
TRUE	255	E20	MW1041 Cotton (Swab 12)	8.83	87400000	0	E - Extrapolated concentration in standard curve
TRUE	255	E21	MW1041 Cotton (Swab 12)	8.79	89200000	0	E - Extrapolated concentration in standard curve
TRUE	255	C19	MW130 Albumin (Swab 9)	11.21	20900000	0	E - Extrapolated concentration in standard curve
TRUE	255	C20	MW130 Albumin (Swab 9)	11.01	23500000	0	E - Extrapolated concentration in standard curve
TRUE	255	C21	MW130 Albumin (Swab 9)	11.18	21300000	0	E - Extrapolated concentration in standard curve
TRUE	255	C13	NaCl 0.9% v1	32.89	2.2	0
TRUE	255	C14	NaCl 0.9% v1	32.8	2.42	0
TRUE	255	C15	NaCl 0.9% v1	32.68	2.75	0
TRUE	255	E13	NaCl 0.9% v2	32.56	3.11	0
TRUE	255	E14	NaCl 0.9% v2	32.24	4.3	0
TRUE	255	E15	NaCl 0.9% v2	31.52	8.89	0
TRUE	255	G13	NaCl 0.9% v3	34.5	0.399	0	E - Extrapolated concentration in standard curve
TRUE	255	G14	NaCl 0.9% v3	33.77	0.881	0	E - Extrapolated concentration in standard curve
TRUE	255	G15	NaCl 0.9% v3	32.57	3.07	0
TRUE	255	N16	NC - 19/11/18	28.92	106	0
TRUE	255	N17	NC - 19/11/18	28.61	141	0
TRUE	255	N18	NC - 19/11/18	28.75	124	0
TRUE	255	O13	NC - qPCR water (2/11/19)	44.16	2.48e-06	0
TRUE	255	O14	NC - qPCR water (2/11/19)	38.94	0.00233	0
TRUE	255	O15	NC - qPCR water (2/11/19)	40.5	0.000328	0
TRUE	255	A13	NC DNA ext 31/8/18	29.09	90.6	0
TRUE	255	A14	NC DNA ext 31/8/18	29.35	71.7	0
TRUE	255	A15	NC DNA ext 31/8/18	28.75	124	0
TRUE	255	P10	NC DNA ext 4/12/18	29.36	70.7	0
TRUE	255	P11	NC DNA ext 4/12/18	29.45	65.2	0
TRUE	255	P12	NC DNA ext 4/12/18	29.67	53.2	0
TRUE	255	F10	NC Swab 12	20.14	96000	0
TRUE	255	F11	NC Swab 12	19.99	105000	0
TRUE	255	F12	NC Swab 12	19.8	119000	0
TRUE	255	B10	NC Swab 2	24.35	4980	0
TRUE	255	B11	NC Swab 2	24.28	5250	0
TRUE	255	B12	NC Swab 2	24.76	3610	0
TRUE	255	H10	NC Swab 27	26.75	715	0
TRUE	255	H11	NC Swab 27	26.63	789	0
TRUE	255	H12	NC Swab 27	26.03	1300	0
TRUE	255	J10	NC Swab 31	20.13	96500	0
TRUE	255	J11	NC Swab 31	19.13	180000	0
TRUE	255	J12	NC Swab 31	18.72	230000	0
TRUE	255	L10	NC Swab 36	18.5	262000	0
TRUE	255	L11	NC Swab 36	18.69	235000	0
TRUE	255	L12	NC Swab 36	18.51	261000	0
TRUE	255	N10	NC Swab 37	15.08	2040000	0	E - Extrapolated concentration in standard curve
TRUE	255	N11	NC Swab 37	15.04	2100000	0	E - Extrapolated concentration in standard curve
TRUE	255	N12	NC Swab 37	14.83	2370000	0	E - Extrapolated concentration in standard curve
TRUE	255	D10	NC Swab 9	18.86	212000	0
TRUE	255	D11	NC Swab 9	18.7	233000	0
TRUE	255	D12	NC Swab 9	18.56	253000	0
TRUE	255	F16	NSEQ009 Air swab	28.78	121	0
TRUE	255	F17	NSEQ009 Air swab	28.44	164	0
TRUE	255	F18	NSEQ009 Air swab	28.33	181	0
TRUE	255	B16	NSEQ009 left corneal swab	24.22	5510	0
TRUE	255	B17	NSEQ009 left corneal swab	24.24	5410	0
TRUE	255	B18	NSEQ009 left corneal swab	24.12	5930	0
TRUE	255	D16	NSEQ009 Right conj swab	27.76	300	0
TRUE	255	D17	NSEQ009 Right conj swab	27.89	268	0
TRUE	255	D18	NSEQ009 Right conj swab	27.5	375	0
TRUE	255	L16	NSEQ013/BMEC/2018 Swab 1	27.22	481	0
TRUE	255	L17	NSEQ013/BMEC/2018 Swab 1	26.83	672	0
TRUE	255	L18	NSEQ013/BMEC/2018 Swab 1	26.79	695	0
TRUE	255	H16	NSEQ013/BMEC/2018 Swab 2	27.69	318	0
TRUE	255	H17	NSEQ013/BMEC/2018 Swab 2	27.07	544	0
TRUE	255	H18	NSEQ013/BMEC/2018 Swab 2	26.76	710	0
TRUE	255	J16	NSEQ013/BMEC/2018 Swab 3	29.59	57.3	0
TRUE	255	J17	NSEQ013/BMEC/2018 Swab 3	29.09	91	0
TRUE	255	J18	NSEQ013/BMEC/2018 Swab 3	28.85	113	0
TRUE	255	P16	PC - 19/11/18	26.59	821	0
TRUE	255	P17	PC - 19/11/18	26.26	1080	0
TRUE	255	P18	PC - 19/11/18	26.14	1190	0
TRUE	255	O19	PC DNA ext - 31/08/2018	20.79	63100	0
TRUE	255	O20	PC DNA ext - 31/08/2018	20.66	68800	0
TRUE	255	O21	PC DNA ext - 31/08/2018	20.75	64600	0
TRUE	255	I19	SugiSpear (Swab 31)	15.15	1960000	0
TRUE	255	I20	SugiSpear (Swab 31)	15.1	2020000	0	E - Extrapolated concentration in standard curve
TRUE	255	I21	SugiSpear (Swab 31)	15.09	2030000	0	E - Extrapolated concentration in standard curve
TRUE	255	I13	Water for inj v1	33.28	1.47	0	E - Extrapolated concentration in standard curve
TRUE	255	I14	Water for inj v1	33.66	0.983	0	E - Extrapolated concentration in standard curve
TRUE	255	I15	Water for inj v1	34.03	0.664	0	E - Extrapolated concentration in standard curve
TRUE	255	K13	Water for inj v2	34.66	0.335	0	E - Extrapolated concentration in standard curve
TRUE	255	K14	Water for inj v2	35.89	0.0858	0	E - Extrapolated concentration in standard curve
TRUE	255	K15	Water for inj v2	32.67	2.79	0
TRUE	255	M13	Water for inj v3	37.12	0.0208	0	E - Extrapolated concentration in standard curve
TRUE	255	M14	Water for inj v3	39.8	0.000796	0	E - Extrapolated concentration in standard curve
TRUE	255	M15	Water for inj v3	35.26	0.172	0	E - Extrapolated concentration in standard curve
