# Supplementary material for: Evaluation of full-length nanopore 16S sequencing for detection of pathogens in microbial keratitis
Source: PeerJ. 2021 Feb 15;9:e10778. doi: 10.7717/peerj.10778 (PMC7891086; doi:10.7717/peerj.10778)
Supplement: Supplemental Information 8 [file peerj-09-10778-s008.xlsx]

## Sheet: LL 20190118 16S swabs
Experiment: LL 20190118 16S swabs Selected Filter: FAM (465-510)
Include	Color	Pos	Name	Cp	Concentration	Standard
TRUE	255	A1	16/08/18NCSwab1	23.85		0
TRUE	255	A2	16/08/18NCSwab1	23.9		0
TRUE	255	A3	16/08/18NCSwab1	24.73		0
TRUE	255	A4	16/08/18NCSwab17	25.04		0
TRUE	255	A5	16/08/18NCSwab17	24.02		0
TRUE	255	A6	16/08/18NCSwab17	24.19		0
TRUE	255	A7	16/08/18Swab13	21.76		0
TRUE	255	A8	16/08/18Swab13	22.34		0
TRUE	255	A9	16/08/18Swab13	23.26		0
TRUE	255	A10	21/08/2018NCSwab 8	20.81		0
TRUE	255	A11	21/08/2018NCSwab 8	20.25		0
TRUE	255	A12	21/08/2018NCSwab 8	20.92		0
TRUE	255	A13	23/08/2018NCSwab 24	22.96		0
TRUE	255	A14	23/08/2018NCSwab 24	23.06		0
TRUE	255	A15	23/08/2018NCSwab 24	22.99		0
TRUE	255	A16	23/08/2018NCSwab 40	16.83		0
TRUE	255	A17	23/08/2018NCSwab 40	17.73		0
TRUE	255	A18	23/08/2018NCSwab 40	17.84		0
TRUE	255	A19	21/08/2018Swab 16	14.49		0
TRUE	255	A20	21/08/2018Swab 16	14.93		0
TRUE	255	A21	21/08/2018Swab 16	14.64		0
TRUE	255	A22	23/08/2018Swab 32	15.08		0
TRUE	255	A23	23/08/2018Swab 32	16.87		0
TRUE	255	A24	23/08/2018Swab 32	15.89		0
TRUE	255	B1	16/08/18NCSwab9	23.98		0
TRUE	255	B2	16/08/18NCSwab9	23.97		0
TRUE	255	B3	16/08/18NCSwab9	24.02		0
TRUE	255	B4	16/08/18Swab5	24.13		0
TRUE	255	B5	16/08/18Swab5	24.35		0
TRUE	255	B6	16/08/18Swab5	24.21		0
TRUE	255	B7	16/08/18NCDNA ext	24.24		0
TRUE	255	B8	16/08/18NCDNA ext	24.37		0
TRUE	255	B9	16/08/18NCDNA ext	24.32		0
TRUE	255	B10	21/08/2018NCSwab 16	18.16		0
TRUE	255	B11	21/08/2018NCSwab 16	18.52		0
TRUE	255	B12	21/08/2018NCSwab 16	18.05		0
TRUE	255	B13	23/08/2018NCSwab 32	23.01		0
TRUE	255	B14	23/08/2018NCSwab 32	22.89		0
TRUE	255	B15	23/08/2018NCSwab 32	22.53		0
TRUE	255	B16	21/08/2018Swab 8	14.83		0
TRUE	255	B17	21/08/2018Swab 8	15.32		0
TRUE	255	B18	21/08/2018Swab 8	15.42		0
TRUE	255	B19	23/08/2018Swab 24	22.53		0
TRUE	255	B20	23/08/2018Swab 24	22.62		0
TRUE	255	B21	23/08/2018Swab 24	23.02		0
TRUE	255	B22	23/08/2018Swab 40	14.83		0
TRUE	255	B23	23/08/2018Swab 40	15.35		0
TRUE	255	B24	23/08/2018Swab 40	15.23		0
TRUE	255	C1	16/08/18NCSwab2	23.76		0
TRUE	255	C2	16/08/18NCSwab2	23.62		0
TRUE	255	C3	16/08/18NCSwab2	24.46		0
TRUE	255	C4	16/08/18NCSwab18	23.96		0
TRUE	255	C5	16/08/18NCSwab18	24.02		0
TRUE	255	C6	16/08/18NCSwab18	24.12		0
TRUE	255	C7	16/08/18Swab14	21.22		0
TRUE	255	C8	16/08/18Swab14	21.36		0
TRUE	255	C9	16/08/18Swab14	22.32		0
TRUE	255	C10	21/08/2018NCSwab 9	18.06		0
TRUE	255	C11	21/08/2018NCSwab 9	17.73		0
TRUE	255	C12	21/08/2018NCSwab 9	17.84		0
TRUE	255	C13	23/08/2018NCSwab 25	17.21		0
TRUE	255	C14	23/08/2018NCSwab 25	17.6		0
TRUE	255	C15	23/08/2018NCSwab 25	18.33		0
TRUE	255	C16	21/08/2018Swab 1	19.92		0
TRUE	255	C17	21/08/2018Swab 1	20.05		0
TRUE	255	C18	21/08/2018Swab 1	20.26		0
TRUE	255	C19	21/08/2018Swab 17	12.97		0
TRUE	255	C20	21/08/2018Swab 17	13.1		0
TRUE	255	C21	21/08/2018Swab 17	12.99		0
TRUE	255	C22	23/08/2018Swab 33	14.51		0
TRUE	255	C23	23/08/2018Swab 33	15.83		0
TRUE	255	C24	23/08/2018Swab 33	15.56		0
TRUE	255	D1	16/08/18NCSwab10	24.48		0
TRUE	255	D2	16/08/18NCSwab10	24.15		0
TRUE	255	D3	16/08/18NCSwab10	23.89		0
TRUE	255	D4	16/08/18Swab6	20.35		0
TRUE	255	D5	16/08/18Swab6	20.56		0
TRUE	255	D6	16/08/18Swab6	20.52		0
TRUE	255	D7	21/08/2018NCSwab 1	20.99		0
TRUE	255	D8	21/08/2018NCSwab 1	21.23		0
TRUE	255	D9	21/08/2018NCSwab 1	21.34		0
TRUE	255	D10	21/08/2018NCSwab 17	16.84		0
TRUE	255	D11	21/08/2018NCSwab 17	16.92		0
TRUE	255	D12	21/08/2018NCSwab 17	17.16		0
TRUE	255	D13	23/08/2018NCSwab 33	20.53		0
TRUE	255	D14	23/08/2018NCSwab 33	20.37		0
TRUE	255	D15	23/08/2018NCSwab 33	19.77		0
TRUE	255	D16	21/08/2018Swab 9	11.83		0
TRUE	255	D17	21/08/2018Swab 9	11.99		0
TRUE	255	D18	21/08/2018Swab 9	11.98		0
TRUE	255	D19	23/08/2018Swab 25	17.81		0
TRUE	255	D20	23/08/2018Swab 25	18.06		0
TRUE	255	D21	23/08/2018Swab 25	17.96		0
TRUE	255	D22	31/08/2018NCDNA ext	22.68		0
TRUE	255	D23	31/08/2018NCDNA ext	23.36		0
TRUE	255	D24	31/08/2018NCDNA ext	23.53		0
TRUE	255	E1	16/08/18NCSwab3	23.55		0
TRUE	255	E2	16/08/18NCSwab3	23.33		0
TRUE	255	E3	16/08/18NCSwab3	24.16		0
TRUE	255	E4	16/08/18NCSwab19	23.49		0
TRUE	255	E5	16/08/18NCSwab19	23.6		0
TRUE	255	E6	16/08/18NCSwab19	23.87		0
TRUE	255	E7	16/08/18Swab15	22.4		0
TRUE	255	E8	16/08/18Swab15	22.29		0
TRUE	255	E9	16/08/18Swab15	22.48		0
TRUE	255	E10	21/08/2018NCSwab 10	19.28		0
TRUE	255	E11	21/08/2018NCSwab 10	18.87		0
TRUE	255	E12	21/08/2018NCSwab 10	19.32		0
TRUE	255	E13	23/08/2018NCSwab 26	20.26		0
TRUE	255	E14	23/08/2018NCSwab 26	20.67		0
TRUE	255	E15	23/08/2018NCSwab 26	20.74		0
TRUE	255	E16	21/08/2018Swab 2	18.48		0
TRUE	255	E17	21/08/2018Swab 2	18.61		0
TRUE	255	E18	21/08/2018Swab 2	18.8		0
TRUE	255	E19	21/08/2018Swab 18	13.25		0
TRUE	255	E20	21/08/2018Swab 18	13.27		0
TRUE	255	E21	21/08/2018Swab 18	13.27		0
TRUE	255	E22	23/08/2018Swab 34	16.13		0
TRUE	255	E23	23/08/2018Swab 34	17.61		0
TRUE	255	E24	23/08/2018Swab 34	17.17		0
TRUE	255	F1	16/08/18NCSwab11	24.07		0
TRUE	255	F2	16/08/18NCSwab11	24.18		0
TRUE	255	F3	16/08/18NCSwab11	24.35		0
TRUE	255	F4	16/08/18Swab7	20.55		0
TRUE	255	F5	16/08/18Swab7	20.94		0
TRUE	255	F6	16/08/18Swab7	20.79		0
TRUE	255	F7	21/08/2018NCSwab 2	22.14		0
TRUE	255	F8	21/08/2018NCSwab 2	22.28		0
TRUE	255	F9	21/08/2018NCSwab 2	22.56		0
TRUE	255	F10	21/08/2018NCSwab 18	15.91		0
TRUE	255	F11	21/08/2018NCSwab 18	16.06		0
TRUE	255	F12	21/08/2018NCSwab 18	16.17		0
TRUE	255	F13	23/08/2018NCSwab 34	21.07		0
TRUE	255	F14	23/08/2018NCSwab 34	21.09		0
TRUE	255	F15	23/08/2018NCSwab 34	20.82		0
TRUE	255	F16	21/08/2018Swab 10	15.34		0
TRUE	255	F17	21/08/2018Swab 10	15.51		0
TRUE	255	F18	21/08/2018Swab 10	15.45		0
TRUE	255	F19	23/08/2018Swab 26	16.72		0
TRUE	255	F20	23/08/2018Swab 26	17		0
TRUE	255	F21	23/08/2018Swab 26	16.97		0
TRUE	255	F22	31/08/2018PCDNA ext	19.83		0
TRUE	255	F23	31/08/2018PCDNA ext	19.91		0
TRUE	255	F24	31/08/2018PCDNA ext	19.65		0
TRUE	255	G1	16/08/18NCSwab4	23.68		0
TRUE	255	G2	16/08/18NCSwab4	23.5		0
TRUE	255	G3	16/08/18NCSwab4	23.96		0
TRUE	255	G4	16/08/18NCSwab20	24.07		0
TRUE	255	G5	16/08/18NCSwab20	24.12		0
TRUE	255	G6	16/08/18NCSwab20	24.26		0
TRUE	255	G7	16/08/18Swab16	20.82		0
TRUE	255	G8	16/08/18Swab16	20.53		0
TRUE	255	G9	16/08/18Swab16	20.86		0
TRUE	255	G10	21/08/2018NCSwab 11	19.28		0
TRUE	255	G11	21/08/2018NCSwab 11	19.24		0
TRUE	255	G12	21/08/2018NCSwab 11	19.28		0
TRUE	255	G13	23/08/2018NCSwab 27	22.99		0
TRUE	255	G14	23/08/2018NCSwab 27	23.14		0
TRUE	255	G15	23/08/2018NCSwab 27	23.25		0
TRUE	255	G16	21/08/2018Swab 3	23.7		0
TRUE	255	G17	21/08/2018Swab 3	23.78		0
TRUE	255	G18	21/08/2018Swab 3	23.71		0
TRUE	255	G19	21/08/2018Swab 19	12.26		0
TRUE	255	G20	21/08/2018Swab 19	12.05		0
TRUE	255	G21	21/08/2018Swab 19	12.22		0
TRUE	255	G22	23/08/2018Swab 35	15.82		0
TRUE	255	G23	23/08/2018Swab 35	17.58		0
TRUE	255	G24	23/08/2018Swab 35	16.86		0
TRUE	255	H1	16/08/18NCSwab12	23.74		0
TRUE	255	H2	16/08/18NCSwab12	23.75		0
TRUE	255	H3	16/08/18NCSwab12	23.9		0
TRUE	255	H4	16/08/18Swab8	21.58		0
TRUE	255	H5	16/08/18Swab8	21.25		0
TRUE	255	H6	16/08/18Swab8	21.15		0
TRUE	255	H7	21/08/2018NCSwab 3	18.53		0
TRUE	255	H8	21/08/2018NCSwab 3	18.62		0
TRUE	255	H9	21/08/2018NCSwab 3	18.76		0
TRUE	255	H10	21/08/2018NCSwab 19	17.7		0
TRUE	255	H11	21/08/2018NCSwab 19	17.65		0
TRUE	255	H12	21/08/2018NCSwab 19	17.69		0
TRUE	255	H13	23/08/2018NCSwab 35	21.58		0
TRUE	255	H14	23/08/2018NCSwab 35	21.55		0
TRUE	255	H15	23/08/2018NCSwab 35	20.98		0
TRUE	255	H16	21/08/2018Swab 11	13.44		0
TRUE	255	H17	21/08/2018Swab 11	13.78		0
TRUE	255	H18	21/08/2018Swab 11	13.67		0
TRUE	255	H19	23/08/2018Swab 27	16.06		0
TRUE	255	H20	23/08/2018Swab 27	15.92		0
TRUE	255	H21	23/08/2018Swab 27	16.5		0
TRUE	255	H22	0	23.62		0
TRUE	255	H23	0	23.6		0
TRUE	255	H24	0	23.61		0
TRUE	255	I1	16/08/18NCSwab5	23.54		0
TRUE	255	I2	16/08/18NCSwab5	23.31		0
TRUE	255	I3	16/08/18NCSwab5	24.04		0
TRUE	255	I4	16/08/18Swab1	23.07		0
TRUE	255	I5	16/08/18Swab1	23.05		0
TRUE	255	I6	16/08/18Swab1	23.29		0
TRUE	255	I7	16/08/18Swab17	21.8		0
TRUE	255	I8	16/08/18Swab17	22.02		0
TRUE	255	I9	16/08/18Swab17	22.65		0
TRUE	255	I10	21/08/2018NCSwab 12	19.96		0
TRUE	255	I11	21/08/2018NCSwab 12	19.92		0
TRUE	255	I12	21/08/2018NCSwab 12	20.05		0
TRUE	255	I13	23/08/2018NCSwab 28	16.45		0
TRUE	255	I14	23/08/2018NCSwab 28	16.55		0
TRUE	255	I15	23/08/2018NCSwab 28	16.83		0
TRUE	255	I16	21/08/2018Swab 4	20.5		0
TRUE	255	I17	21/08/2018Swab 4	20.64		0
TRUE	255	I18	21/08/2018Swab 4	20.57		0
TRUE	255	I19	21/08/2018Swab 20	12.33		0
TRUE	255	I20	21/08/2018Swab 20	12.12		0
TRUE	255	I21	21/08/2018Swab 20	12.47		0
TRUE	255	I22	23/08/2018Swab 36	13.61		0
TRUE	255	I23	23/08/2018Swab 36	15.03		0
TRUE	255	I24	23/08/2018Swab 36	14.48		0
TRUE	255	J1	16/08/18NCSwab13	23.99		0
TRUE	255	J2	16/08/18NCSwab13	23.94		0
TRUE	255	J3	16/08/18NCSwab13	24.24		0
TRUE	255	J4	16/08/18Swab9	21.91		0
TRUE	255	J5	16/08/18Swab9	22.48		0
TRUE	255	J6	16/08/18Swab9	22.05		0
TRUE	255	J7	21/08/2018NCSwab 4	21.15		0
TRUE	255	J8	21/08/2018NCSwab 4	21.24		0
TRUE	255	J9	21/08/2018NCSwab 4	21.58		0
TRUE	255	J10	21/08/2018NCSwab 20	17.88		0
TRUE	255	J11	21/08/2018NCSwab 20	17.98		0
TRUE	255	J12	21/08/2018NCSwab 20	18.1		0
TRUE	255	J13	23/08/2018NCSwab 36	19.01		0
TRUE	255	J14	23/08/2018NCSwab 36	19.18		0
TRUE	255	J15	23/08/2018NCSwab 36	18.95		0
TRUE	255	J16	21/08/2018Swab 12	10.21		0
TRUE	255	J17	21/08/2018Swab 12	10.61		0
TRUE	255	J18	21/08/2018Swab 12	10.51		0
TRUE	255	J19	23/08/2018Swab 28	16.68		0
TRUE	255	J20	23/08/2018Swab 28	16.7		0
TRUE	255	J21	23/08/2018Swab 28	17.01		0
TRUE	255	J22	0	19.61		0
TRUE	255	J23	0	19.23		0
TRUE	255	J24	0	19.43		0
TRUE	255	K1	16/08/18NCSwab6	23.57		0
TRUE	255	K2	16/08/18NCSwab6	23.73		0
TRUE	255	K3	16/08/18NCSwab6	24.08		0
TRUE	255	K4	16/08/18Swab2	23.99		0
TRUE	255	K5	16/08/18Swab2	23.88		0
TRUE	255	K6	16/08/18Swab2	24.11		0
TRUE	255	K7	16/08/18Swab18	21.57		0
TRUE	255	K8	16/08/18Swab18	22.28		0
TRUE	255	K9	16/08/18Swab18	22.27		0
TRUE	255	K10	21/08/2018NCSwab 13	15.73		0
TRUE	255	K11	21/08/2018NCSwab 13	15.55		0
TRUE	255	K12	21/08/2018NCSwab 13	15.66		0
TRUE	255	K13	23/08/2018NCSwab 29	19.03		0
TRUE	255	K14	23/08/2018NCSwab 29	19.03		0
TRUE	255	K15	23/08/2018NCSwab 29	19.9		0
TRUE	255	K16	21/08/2018Swab 5	14.87		0
TRUE	255	K17	21/08/2018Swab 5	15.31		0
TRUE	255	K18	21/08/2018Swab 5	15.44		0
TRUE	255	K19	23/08/2018Swab 21	22.99		0
TRUE	255	K20	23/08/2018Swab 21	22.91		0
TRUE	255	K21	23/08/2018Swab 21	23.15		0
TRUE	255	K22	23/08/2018Swab 37	14.1		0
TRUE	255	K23	23/08/2018Swab 37	15.11		0
TRUE	255	K24	23/08/2018Swab 37	14.62		0
TRUE	255	L1	16/08/18NCSwab14	23.71		0
TRUE	255	L2	16/08/18NCSwab14	23.82		0
TRUE	255	L3	16/08/18NCSwab14	21.82		0
TRUE	255	L4	16/08/18Swab10	21.07		0
TRUE	255	L5	16/08/18Swab10	21.32		0
TRUE	255	L6	16/08/18Swab10	21.32		0
TRUE	255	L7	21/08/2018NCSwab 5	13.79		0
TRUE	255	L8	21/08/2018NCSwab 5	13.91		0
TRUE	255	L9	21/08/2018NCSwab 5	14.01		0
TRUE	255	L10	23/08/2018NCSwab 21	23.9		0
TRUE	255	L11	23/08/2018NCSwab 21	23.85		0
TRUE	255	L12	23/08/2018NCSwab 21	24.02		0
TRUE	255	L13	23/08/2018NCSwab 37	16.69		0
TRUE	255	L14	23/08/2018NCSwab 37	17.04		0
TRUE	255	L15	23/08/2018NCSwab 37	16.74		0
TRUE	255	L16	21/08/2018Swab 13	14.35		0
TRUE	255	L17	21/08/2018Swab 13	15.11		0
TRUE	255	L18	21/08/2018Swab 13	14.68		0
TRUE	255	L19	23/08/2018Swab 29	17.31		0
TRUE	255	L20	23/08/2018Swab 29	17.62		0
TRUE	255	L21	23/08/2018Swab 29	17.29		0
TRUE	255	L22	0	23.62		0
TRUE	255	L23	0	23.83		0
TRUE	255	L24	0	24		0
TRUE	255	M1	16/08/18NCSwab7	23.18		0
TRUE	255	M2	16/08/18NCSwab7	23.07		0
TRUE	255	M3	16/08/18NCSwab7	23.85		0
TRUE	255	M4	16/08/18Swab3	23.69		0
TRUE	255	M5	16/08/18Swab3	23.77		0
TRUE	255	M6	16/08/18Swab3	23.87		0
TRUE	255	M7	16/08/18Swab19	20.37		0
TRUE	255	M8	16/08/18Swab19	20.68		0
TRUE	255	M9	16/08/18Swab19	20.75		0
TRUE	255	M10	21/08/2018NCSwab 14	19.73		0
TRUE	255	M11	21/08/2018NCSwab 14	20.05		0
TRUE	255	M12	21/08/2018NCSwab 14	19.75		0
TRUE	255	M13	23/08/2018NCSwab 30	20.79		0
TRUE	255	M14	23/08/2018NCSwab 30	20.8		0
TRUE	255	M15	23/08/2018NCSwab 30	20.98		0
TRUE	255	M16	21/08/2018Swab 6	15.71		0
TRUE	255	M17	21/08/2018Swab 6	15.96		0
TRUE	255	M18	21/08/2018Swab 6	16.11		0
TRUE	255	M19	23/08/2018Swab 22	22.95		0
TRUE	255	M20	23/08/2018Swab 22	22.68		0
TRUE	255	M21	23/08/2018Swab 22	22.9		0
TRUE	255	M22	23/08/2018Swab 38	14.5		0
TRUE	255	M23	23/08/2018Swab 38	15.16		0
TRUE	255	M24	23/08/2018Swab 38	14.66		0
TRUE	255	N1	16/08/18NCSwab15	23.91		0
TRUE	255	N2	16/08/18NCSwab15	24		0
TRUE	255	N3	16/08/18NCSwab15	24.03		0
TRUE	255	N4	16/08/18Swab11	22.18		0
TRUE	255	N5	16/08/18Swab11	22.92		0
TRUE	255	N6	16/08/18Swab11	22.25		0
TRUE	255	N7	21/08/2018NCSwab 6	17.34		0
TRUE	255	N8	21/08/2018NCSwab 6	16.93		0
TRUE	255	N9	21/08/2018NCSwab 6	17.28		0
TRUE	255	N10	23/08/2018NCSwab 22	24.08		0
TRUE	255	N11	23/08/2018NCSwab 22	24.05		0
TRUE	255	N12	23/08/2018NCSwab 22	24.07		0
TRUE	255	N13	23/08/2018NCSwab 38	16.89		0
TRUE	255	N14	23/08/2018NCSwab 38	16.97		0
TRUE	255	N15	23/08/2018NCSwab 38	16.87		0
TRUE	255	N16	21/08/2018Swab 14	15.48		0
TRUE	255	N17	21/08/2018Swab 14	15.81		0
TRUE	255	N18	21/08/2018Swab 14	15.74		0
TRUE	255	N19	23/08/2018Swab 30	18.16		0
TRUE	255	N20	23/08/2018Swab 30	17.97		0
TRUE	255	N21	23/08/2018Swab 30	17.88		0
TRUE	255	N22	0	23.76		0
TRUE	255	N23	0	23.9		0
TRUE	255	N24	0	23.88		0
TRUE	255	O1	16/08/18NCSwab8	23.25		0
TRUE	255	O2	16/08/18NCSwab8	23.25		0
TRUE	255	O3	16/08/18NCSwab8	23.94		0
TRUE	255	O4	16/08/18Swab4	23.19		0
TRUE	255	O5	16/08/18Swab4	23.2		0
TRUE	255	O6	16/08/18Swab4	23.32		0
TRUE	255	O7	16/08/18Swab20	22.23		0
TRUE	255	O8	16/08/18Swab20	22.71		0
TRUE	255	O9	16/08/18Swab20	23.6		0
TRUE	255	O10	21/08/2018NCSwab 15	17.64		0
TRUE	255	O11	21/08/2018NCSwab 15	17.68		0
TRUE	255	O12	21/08/2018NCSwab 15	17.76		0
TRUE	255	O13	23/08/2018NCSwab 31	19.34		0
TRUE	255	O14	23/08/2018NCSwab 31	19.02		0
TRUE	255	O15	23/08/2018NCSwab 31	19.56		0
TRUE	255	O16	21/08/2018Swab 7	11.32		0
TRUE	255	O17	21/08/2018Swab 7	11.29		0
TRUE	255	O18	21/08/2018Swab 7	11.49		0
TRUE	255	O19	23/08/2018Swab 23	21.72		0
TRUE	255	O20	23/08/2018Swab 23	21.78		0
TRUE	255	O21	23/08/2018Swab 23	21.87		0
TRUE	255	O22	23/08/2018Swab 39	13.8		0
TRUE	255	O23	23/08/2018Swab 39	15.29		0
TRUE	255	O24	23/08/2018Swab 39	14.28		0
TRUE	255	P1	16/08/18NCSwab16	23.97		0
TRUE	255	P2	16/08/18NCSwab16	24.57		0
TRUE	255	P3	16/08/18NCSwab16	24.17		0
TRUE	255	P4	16/08/18Swab12	20.89		0
TRUE	255	P5	16/08/18Swab12	21.01		0
TRUE	255	P6	16/08/18Swab12	21.08		0
TRUE	255	P7	21/08/2018NCSwab 7	17.93		0
TRUE	255	P8	21/08/2018NCSwab 7	18.03		0
TRUE	16711680	P9	21/08/2018NCSwab 7	18.21		0
TRUE	255	P10	23/08/2018NCSwab 23	23.33		0
TRUE	255	P11	23/08/2018NCSwab 23	23.16		0
TRUE	255	P12	23/08/2018NCSwab 23	23.2		0
TRUE	255	P13	23/08/2018NCSwab 39	19.03		0
TRUE	255	P14	23/08/2018NCSwab 39	19.08		0
TRUE	255	P15	23/08/2018NCSwab 39	19.04		0
TRUE	255	P16	21/08/2018Swab 15	15.81		0
TRUE	255	P17	21/08/2018Swab 15	16.13		0
TRUE	255	P18	21/08/2018Swab 15	16.15		0
TRUE	255	P19	23/08/2018Swab 31	16.57		0
TRUE	255	P20	23/08/2018Swab 31	15.92		0
TRUE	255	P21	23/08/2018Swab 31	16.27		0
TRUE	255	P22	0	23.84		0
TRUE	255	P23	0	23.69		0
TRUE	255	P24	0	23.84		0
