# Supplementary material for: Evaluation of full-length nanopore 16S sequencing for detection of pathogens in microbial keratitis
Source: PeerJ. 2021 Feb 15;9:e10778. doi: 10.7717/peerj.10778 (PMC7891086; doi:10.7717/peerj.10778)
Supplement: Supplemental Information 9 [file peerj-09-10778-s009.xlsx]

## Sheet: swab number to name
Row Labels	Type of Swab
16/08/18NCDNA ext
16/08/18NCSwab1	NC_MW821 Dryswab Flock
16/08/18NCSwab10	NC_MW1041 Cotton
16/08/18NCSwab11	NC_MW1041 Cotton
16/08/18NCSwab12	NC_MW946 Purfoam
16/08/18NCSwab13	NC_MW946 Purfoam
16/08/18NCSwab14	NC_MW840 Hydraflock Plastic
16/08/18NCSwab15	NC_MW840 Hydraflock Plastic
16/08/18NCSwab16	NC_MW1021 Rayon
16/08/18NCSwab17	NC_MW1021 Rayon
16/08/18NCSwab18	NC_Isohelix SK2
16/08/18NCSwab19	NC_Isohelix SK2
16/08/18NCSwab2	NC_PTFE 4mm
16/08/18NCSwab20	NC_MW821 Dryswab Flock
16/08/18NCSwab3	NC_PTFE 4mm
16/08/18NCSwab4	NC_MW1021D Polyester
16/08/18NCSwab5	NC_MW1021D Polyester
16/08/18NCSwab6	NC_MW100 Fine tip Dryswab Rayon
16/08/18NCSwab7	NC_MW100 Fine tip Dryswab Rayon
16/08/18NCSwab8	NC_MW130 Albumin
16/08/18NCSwab9	NC_MW130 Albumin
21/08/2018NCSwab 1	NC_Needle
21/08/2018NCSwab 10	NC_MW130 Albumin
21/08/2018NCSwab 11	NC_MW1041 Cotton
21/08/2018NCSwab 12	NC_MW1041 Cotton
21/08/2018NCSwab 13	NC_MW946 Purfoam
21/08/2018NCSwab 14	NC_MW946 Purfoam
21/08/2018NCSwab 15	NC_MW840 Hydraflock Plastic
21/08/2018NCSwab 16	NC_MW840 Hydraflock Plastic
21/08/2018NCSwab 17	NC_MW1021 Rayon
21/08/2018NCSwab 18	NC_MW1021 Rayon
21/08/2018NCSwab 19	NC_MW821 Dryswab Flock
21/08/2018NCSwab 2	NC_Needle
21/08/2018NCSwab 20	NC_MW821 Dryswab Flock
21/08/2018NCSwab 3	NC_PTFE 4mm
21/08/2018NCSwab 4	NC_PTFE 4mm
21/08/2018NCSwab 5	NC_MW1021D Polyester
21/08/2018NCSwab 6	NC_MW1021D Polyester
21/08/2018NCSwab 7	NC_MW100 Fine tip Dryswab Rayon
21/08/2018NCSwab 8	NC_MW100 Fine tip Dryswab Rayon
21/08/2018NCSwab 9	NC_MW130 Albumin
23/08/2018NCSwab 21	NC_Needle
23/08/2018NCSwab 22	NC_Needle
23/08/2018NCSwab 23	NC_PTFE 6mm
23/08/2018NCSwab 24	NC_PTFE 6mm
23/08/2018NCSwab 25	NC_Sugi® Eyespear
23/08/2018NCSwab 26	NC_Sugi® Eyespear
23/08/2018NCSwab 27	NC_MW1021D Polyester
23/08/2018NCSwab 28	NC_MW1021D Polyester
23/08/2018NCSwab 29	NC_MW100 Fine tip Dryswab Rayon
23/08/2018NCSwab 30	NC_MW100 Fine tip Dryswab Rayon
23/08/2018NCSwab 31	NC_Sugi® Eyespear
23/08/2018NCSwab 32	NC_Sugi® Eyespear
23/08/2018NCSwab 33	NC_MW1041 Cotton
23/08/2018NCSwab 34	NC_MW1041 Cotton
23/08/2018NCSwab 35	NC_MW1021 Rayon
23/08/2018NCSwab 36	NC_MW1021 Rayon
23/08/2018NCSwab 37	NC_Isohelix SK2
23/08/2018NCSwab 38	NC_Isohelix SK2
23/08/2018NCSwab 39	NC_Isohelix SK2
23/08/2018NCSwab 40	NC_Isohelix SK2
31/08/2018NCDNA ext	31/08/2018NCDNA ext
31/08/2018PCDNA ext	31/08/2018PCDNA ext
16/08/18Swab1	MW821 Dryswab Flock
16/08/18Swab10	MW1041 Cotton
16/08/18Swab11	MW1041 Cotton
16/08/18Swab12	MW946 Purfoam
16/08/18Swab13	MW946 Purfoam
16/08/18Swab14	MW840 Hydraflock Plastic
16/08/18Swab15	MW840 Hydraflock Plastic
16/08/18Swab16	MW1021 Rayon
16/08/18Swab17	MW1021 Rayon
16/08/18Swab18	Isohelix SK2
16/08/18Swab19	Isohelix SK2
16/08/18Swab2	PTFE 4mm
16/08/18Swab20	MW821 Dryswab Flock
16/08/18Swab3	PTFE 4mm
16/08/18Swab4	MW1021D Polyester
16/08/18Swab5	MW1021D Polyester
16/08/18Swab6	MW100 Fine tip Dryswab Rayon
16/08/18Swab7	MW100 Fine tip Dryswab Rayon
16/08/18Swab8	MW130 Albumin
16/08/18Swab9	MW130 Albumin
21/08/2018Swab 1	Needle
21/08/2018Swab 10	MW130 Albumin
21/08/2018Swab 11	MW1041 Cotton
21/08/2018Swab 12	MW1041 Cotton
21/08/2018Swab 13	MW946 Purfoam
21/08/2018Swab 14	MW946 Purfoam
21/08/2018Swab 15	MW840 Hydraflock Plastic
21/08/2018Swab 16	MW840 Hydraflock Plastic
21/08/2018Swab 17	MW1021 Rayon
21/08/2018Swab 18	MW1021 Rayon
21/08/2018Swab 19	MW821 Dryswab Flock
21/08/2018Swab 2	Needle
21/08/2018Swab 20	MW821 Dryswab Flock
21/08/2018Swab 3	PTFE 4mm
21/08/2018Swab 4	PTFE 4mm
21/08/2018Swab 5	MW1021D Polyester
21/08/2018Swab 6	MW1021D Polyester
21/08/2018Swab 7	MW100 Fine tip Dryswab Rayon
21/08/2018Swab 8	MW100 Fine tip Dryswab Rayon
21/08/2018Swab 9	MW130 Albumin
23/08/2018Swab 21	Needle
23/08/2018Swab 22	Needle
23/08/2018Swab 23	PTFE 6mm
23/08/2018Swab 24	PTFE 6mm
23/08/2018Swab 25	Sugi® Eyespear
23/08/2018Swab 26	Sugi® Eyespear
23/08/2018Swab 27	MW1021D Polyester
23/08/2018Swab 28	MW1021D Polyester
23/08/2018Swab 29	MW100 Fine tip Dryswab Rayon
23/08/2018Swab 30	MW100 Fine tip Dryswab Rayon
23/08/2018Swab 31	Sugi® Eyespear
23/08/2018Swab 32	Sugi® Eyespear
23/08/2018Swab 33	MW1041 Cotton
23/08/2018Swab 34	MW1041 Cotton
23/08/2018Swab 35	MW1021 Rayon
23/08/2018Swab 36	MW1021 Rayon
23/08/2018Swab 37	Isohelix SK2
23/08/2018Swab 38	Isohelix SK2
23/08/2018Swab 39	Isohelix SK2
23/08/2018Swab 40	Isohelix SK2
