# Supplementary material for: Evaluation of full-length nanopore 16S sequencing for detection of pathogens in microbial keratitis
Source: PeerJ. 2021 Feb 15;9:e10778. doi: 10.7717/peerj.10778 (PMC7891086; doi:10.7717/peerj.10778)
Supplement: Supplemental Information 10 [file peerj-09-10778-s010.xlsx]

## Sheet: LL 20190118 B Actin (Primer 2) 
Experiment: LL 20190118 B Actin (Primer 2) Swabs Selected Filter: FAM (465-510)
Include	Color	Pos	Name	Cp	Concentration	Standard	Status
TRUE	255	A1	16/08/18NCSwab1	35		0	> - Late Cp call (last five cycles) has higher uncertainty
TRUE	255	A2	16/08/18NCSwab1	35		0	> - Late Cp call (last five cycles) has higher uncertainty
TRUE	255	A3	16/08/18NCSwab1	35		0	> - Late Cp call (last five cycles) has higher uncertainty
TRUE	255	A4	16/08/18NCSwab17	26.66		0
TRUE	255	A5	16/08/18NCSwab17	26.89		0
TRUE	255	A6	16/08/18NCSwab17	26.69		0
TRUE	255	A7	16/08/18Swab13	25.24		0
TRUE	255	A8	16/08/18Swab13	24.79		0
TRUE	255	A9	16/08/18Swab13	24.51		0
TRUE	255	A10	21/08/2018NCSwab 8	28.5		0
TRUE	255	A11	21/08/2018NCSwab 8	28.52		0
TRUE	255	A12	21/08/2018NCSwab 8	28.21		0
TRUE	255	A13	23/08/2018NCSwab 24	26.25		0
TRUE	255	A14	23/08/2018NCSwab 24	26.33		0
TRUE	255	A15	23/08/2018NCSwab 24	25.96		0
TRUE	255	A16	23/08/2018NCSwab 40	21.64		0
TRUE	255	A17	23/08/2018NCSwab 40	21.86		0
TRUE	255	A18	23/08/2018NCSwab 40	21.27		0
TRUE	255	A19	21/08/2018Swab 16	24.03		0
TRUE	255	A20	21/08/2018Swab 16	24.13		0
TRUE	255	A21	21/08/2018Swab 16	23.47		0
TRUE	255	A22	23/08/2018Swab 32	22.77		0
TRUE	255	A23	23/08/2018Swab 32	22.77		0
TRUE	255	A24	23/08/2018Swab 32	22.7		0
TRUE	255	B1	16/08/18NCSwab9	27.64		0
TRUE	255	B2	16/08/18NCSwab9	27.53		0
TRUE	255	B3	16/08/18NCSwab9	27.47		0
TRUE	255	B4	16/08/18Swab5	28.53		0
TRUE	255	B5	16/08/18Swab5	29.05		0
TRUE	255	B6	16/08/18Swab5	28.07		0
TRUE	255	B7	16/08/18NCDNA ext	35		0	> - Late Cp call (last five cycles) has higher uncertainty
TRUE	255	B8	16/08/18NCDNA ext	35		0	> - Late Cp call (last five cycles) has higher uncertainty
TRUE	255	B9	16/08/18NCDNA ext	32.14		0
TRUE	255	B10	21/08/2018NCSwab 16	27.24		0
TRUE	255	B11	21/08/2018NCSwab 16	27.6		0
TRUE	255	B12	21/08/2018NCSwab 16	27.06		0
TRUE	255	B13	23/08/2018NCSwab 32	26.32		0
TRUE	255	B14	23/08/2018NCSwab 32	26.77		0
TRUE	255	B15	23/08/2018NCSwab 32	26.08		0
TRUE	255	B16	21/08/2018Swab 8	26.04		0
TRUE	255	B17	21/08/2018Swab 8	26.05		0
TRUE	255	B18	21/08/2018Swab 8	25.54		0
TRUE	255	B19	23/08/2018Swab 24	28.75		0
TRUE	255	B20	23/08/2018Swab 24	29.32		0
TRUE	255	B21	23/08/2018Swab 24	28.97		0
TRUE	255	B22	23/08/2018Swab 40	21.7		0
TRUE	255	B23	23/08/2018Swab 40	21.56		0
TRUE	255	B24	23/08/2018Swab 40	20.96		0
TRUE	255	C1	16/08/18NCSwab2	31.66		0
TRUE	255	C2	16/08/18NCSwab2	31.59		0
TRUE	255	C3	16/08/18NCSwab2	31.06		0
TRUE	255	C4	16/08/18NCSwab18	29.77		0
TRUE	255	C5	16/08/18NCSwab18	29.53		0
TRUE	255	C6	16/08/18NCSwab18	29.98		0
TRUE	255	C7	16/08/18Swab14	24.25		0
TRUE	255	C8	16/08/18Swab14	24.11		0
TRUE	255	C9	16/08/18Swab14	23.7		0
TRUE	255	C10	21/08/2018NCSwab 9	30.44		0
TRUE	255	C11	21/08/2018NCSwab 9	31.55		0
TRUE	255	C12	21/08/2018NCSwab 9	30.32		0
TRUE	255	C13	23/08/2018NCSwab 25	22.49		0
TRUE	255	C14	23/08/2018NCSwab 25	22.51		0
TRUE	255	C15	23/08/2018NCSwab 25	22.08		0
TRUE	255	C16	21/08/2018Swab 1	35		0	> - Late Cp call (last five cycles) has higher uncertainty
TRUE	255	C17	21/08/2018Swab 1	35		0	> - Late Cp call (last five cycles) has higher uncertainty
TRUE	255	C18	21/08/2018Swab 1	35		0	> - Late Cp call (last five cycles) has higher uncertainty
TRUE	255	C19	21/08/2018Swab 17	29.09		0
TRUE	255	C20	21/08/2018Swab 17	28.89		0
TRUE	255	C21	21/08/2018Swab 17	28.13		0
TRUE	255	C22	23/08/2018Swab 33	22.32		0
TRUE	255	C23	23/08/2018Swab 33	22.57		0
TRUE	255	C24	23/08/2018Swab 33	22.42		0
TRUE	255	D1	16/08/18NCSwab10	28.32		0
TRUE	255	D2	16/08/18NCSwab10	28.83		0
TRUE	255	D3	16/08/18NCSwab10	28.2		0
TRUE	255	D4	16/08/18Swab6	23.78		0
TRUE	255	D5	16/08/18Swab6	24.23		0
TRUE	255	D6	16/08/18Swab6	23.72		0
TRUE	255	D7	21/08/2018NCSwab 1	32.15		0
TRUE	255	D8	21/08/2018NCSwab 1	31.05		0
TRUE	255	D9	21/08/2018NCSwab 1	30.57		0
TRUE	255	D10	21/08/2018NCSwab 17	29.51		0
TRUE	255	D11	21/08/2018NCSwab 17	29.49		0
TRUE	255	D12	21/08/2018NCSwab 17	29.44		0
TRUE	255	D13	23/08/2018NCSwab 33	23.64		0
TRUE	255	D14	23/08/2018NCSwab 33	23.58		0
TRUE	255	D15	23/08/2018NCSwab 33	23.31		0
TRUE	255	D16	21/08/2018Swab 9	28.97		0
TRUE	255	D17	21/08/2018Swab 9	29.13		0
TRUE	255	D18	21/08/2018Swab 9	28.67		0
TRUE	255	D19	23/08/2018Swab 25	22.87		0
TRUE	255	D20	23/08/2018Swab 25	22.98		0
TRUE	255	D21	23/08/2018Swab 25	22.16		0
TRUE	255	D22	31/08/2018NCDNA ext	35		0	> - Late Cp call (last five cycles) has higher uncertainty
TRUE	255	D23	31/08/2018NCDNA ext	35		0	> - Late Cp call (last five cycles) has higher uncertainty
TRUE	255	D24	31/08/2018NCDNA ext	35		0	> - Late Cp call (last five cycles) has higher uncertainty
TRUE	255	E1	16/08/18NCSwab3	31.81		0
TRUE	255	E2	16/08/18NCSwab3	32.77		0
TRUE	255	E3	16/08/18NCSwab3	35		0	> - Late Cp call (last five cycles) has higher uncertainty
TRUE	255	E4	16/08/18NCSwab19	29.47		0
TRUE	255	E5	16/08/18NCSwab19	29.23		0
TRUE	255	E6	16/08/18NCSwab19	28.79		0
TRUE	255	E7	16/08/18Swab15	25.04		0
TRUE	255	E8	16/08/18Swab15	25.45		0
TRUE	255	E9	16/08/18Swab15	24.67		0
TRUE	255	E10	21/08/2018NCSwab 10	26.64		0
TRUE	255	E11	21/08/2018NCSwab 10	26.33		0
TRUE	255	E12	21/08/2018NCSwab 10	25.96		0
TRUE	255	E13	23/08/2018NCSwab 26	24.73		0
TRUE	255	E14	23/08/2018NCSwab 26	24.93		0
TRUE	255	E15	23/08/2018NCSwab 26	24.57		0
TRUE	255	E16	21/08/2018Swab 2	24.75		0
TRUE	255	E17	21/08/2018Swab 2	24.83		0
TRUE	255	E18	21/08/2018Swab 2	25.74		0
TRUE	255	E19	21/08/2018Swab 18	30.34		0
TRUE	255	E20	21/08/2018Swab 18	30.05		0
TRUE	255	E21	21/08/2018Swab 18	28.8		0
TRUE	255	E22	23/08/2018Swab 34	22.64		0
TRUE	255	E23	23/08/2018Swab 34	22.69		0
TRUE	255	E24	23/08/2018Swab 34	22.69		0
TRUE	255	F1	16/08/18NCSwab11	28.01		0
TRUE	255	F2	16/08/18NCSwab11	28.11		0
TRUE	255	F3	16/08/18NCSwab11	28.04		0
TRUE	255	F4	16/08/18Swab7	24.23		0
TRUE	255	F5	16/08/18Swab7	23.92		0
TRUE	255	F6	16/08/18Swab7	23.43		0
TRUE	255	F7	21/08/2018NCSwab 2	35		0	> - Late Cp call (last five cycles) has higher uncertainty
TRUE	255	F8	21/08/2018NCSwab 2	35		0	> - Late Cp call (last five cycles) has higher uncertainty
TRUE	255	F9	21/08/2018NCSwab 2	35		0	> - Late Cp call (last five cycles) has higher uncertainty
TRUE	255	F10	21/08/2018NCSwab 18	30.78		0
TRUE	255	F11	21/08/2018NCSwab 18	30.62		0
TRUE	255	F12	21/08/2018NCSwab 18	30.8		0
TRUE	255	F13	23/08/2018NCSwab 34	25.62		0
TRUE	255	F14	23/08/2018NCSwab 34	25.2		0
TRUE	255	F15	23/08/2018NCSwab 34	24.78		0
TRUE	255	F16	21/08/2018Swab 10	25.55		0
TRUE	255	F17	21/08/2018Swab 10	25.13		0
TRUE	255	F18	21/08/2018Swab 10	24.88		0
TRUE	255	F19	23/08/2018Swab 26	22.35		0
TRUE	255	F20	23/08/2018Swab 26	21.84		0
TRUE	255	F21	23/08/2018Swab 26	21.25		0
TRUE	255	F22	31/08/2018PCDNA ext	35		0	> - Late Cp call (last five cycles) has higher uncertainty
TRUE	255	F23	31/08/2018PCDNA ext	35		0	> - Late Cp call (last five cycles) has higher uncertainty
TRUE	255	F24	31/08/2018PCDNA ext	35		0	> - Late Cp call (last five cycles) has higher uncertainty
TRUE	255	G1	16/08/18NCSwab4	30.96		0
TRUE	255	G2	16/08/18NCSwab4	31.43		0
TRUE	255	G3	16/08/18NCSwab4	30.74		0
TRUE	255	G4	16/08/18NCSwab20	35		0	> - Late Cp call (last five cycles) has higher uncertainty
TRUE	255	G5	16/08/18NCSwab20	35		0	> - Late Cp call (last five cycles) has higher uncertainty
TRUE	255	G6	16/08/18NCSwab20	35		0	> - Late Cp call (last five cycles) has higher uncertainty
TRUE	255	G7	16/08/18Swab16	22.55		0
TRUE	255	G8	16/08/18Swab16	23.15		0
TRUE	255	G9	16/08/18Swab16	22.65		0
TRUE	255	G10	21/08/2018NCSwab 11	27.43		0
TRUE	255	G11	21/08/2018NCSwab 11	27.49		0
TRUE	255	G12	21/08/2018NCSwab 11	27.43		0
TRUE	255	G13	23/08/2018NCSwab 27	27.74		0
TRUE	255	G14	23/08/2018NCSwab 27	28.06		0
TRUE	255	G15	23/08/2018NCSwab 27	27.25		0
TRUE	255	G16	21/08/2018Swab 3	35		0	> - Late Cp call (last five cycles) has higher uncertainty
TRUE	255	G17	21/08/2018Swab 3	35		0	> - Late Cp call (last five cycles) has higher uncertainty
TRUE	255	G18	21/08/2018Swab 3	35		0	> - Late Cp call (last five cycles) has higher uncertainty
TRUE	255	G19	21/08/2018Swab 19	28.57		0
TRUE	255	G20	21/08/2018Swab 19	28.58		0
TRUE	255	G21	21/08/2018Swab 19	28.23		0
TRUE	255	G22	23/08/2018Swab 35	22.95		0
TRUE	255	G23	23/08/2018Swab 35	23.27		0
TRUE	255	G24	23/08/2018Swab 35	22.81		0
TRUE	255	H1	16/08/18NCSwab12	29.03		0
TRUE	255	H2	16/08/18NCSwab12	29.54		0
TRUE	255	H3	16/08/18NCSwab12	28.43		0
TRUE	255	H4	16/08/18Swab8	24.65		0
TRUE	255	H5	16/08/18Swab8	23.59		0
TRUE	255	H6	16/08/18Swab8	23.21		0
TRUE	255	H7	21/08/2018NCSwab 3	26.69		0
TRUE	255	H8	21/08/2018NCSwab 3	26.83		0
TRUE	255	H9	21/08/2018NCSwab 3	26.32		0
TRUE	255	H10	21/08/2018NCSwab 19	35		0	> - Late Cp call (last five cycles) has higher uncertainty
TRUE	255	H11	21/08/2018NCSwab 19	35		0	> - Late Cp call (last five cycles) has higher uncertainty
TRUE	255	H12	21/08/2018NCSwab 19	32.9		0
TRUE	255	H13	23/08/2018NCSwab 35	25.48		0
TRUE	255	H14	23/08/2018NCSwab 35	24.57		0
TRUE	255	H15	23/08/2018NCSwab 35	23.82		0
TRUE	255	H16	21/08/2018Swab 11	26.73		0
TRUE	255	H17	21/08/2018Swab 11	26.08		0
TRUE	255	H18	21/08/2018Swab 11	26.65		0
TRUE	255	H19	23/08/2018Swab 27	21.75		0
TRUE	255	H20	23/08/2018Swab 27	21.76		0
TRUE	255	H21	23/08/2018Swab 27	20.8		0
TRUE	255	H22	0	35		0	> - Late Cp call (last five cycles) has higher uncertainty
TRUE	255	H23	0	35		0	> - Late Cp call (last five cycles) has higher uncertainty
TRUE	255	H24	0	35		0	> - Late Cp call (last five cycles) has higher uncertainty
TRUE	255	I1	16/08/18NCSwab5	32.42		0
TRUE	255	I2	16/08/18NCSwab5	31.44		0
TRUE	255	I3	16/08/18NCSwab5	30.76		0
TRUE	255	I4	16/08/18Swab1	25.92		0
TRUE	255	I5	16/08/18Swab1	26.07		0
TRUE	255	I6	16/08/18Swab1	25.87		0
TRUE	255	I7	16/08/18Swab17	24.29		0
TRUE	255	I8	16/08/18Swab17	24.64		0
TRUE	255	I9	16/08/18Swab17	24.05		0
TRUE	255	I10	21/08/2018NCSwab 12	26.84		0
TRUE	255	I11	21/08/2018NCSwab 12	27.28		0
TRUE	255	I12	21/08/2018NCSwab 12	26.68		0
TRUE	255	I13	23/08/2018NCSwab 28	21.67		0
TRUE	255	I14	23/08/2018NCSwab 28	21.69		0
TRUE	255	I15	23/08/2018NCSwab 28	21.18		0
TRUE	255	I16	21/08/2018Swab 4	35		0	> - Late Cp call (last five cycles) has higher uncertainty
TRUE	255	I17	21/08/2018Swab 4	35		0	> - Late Cp call (last five cycles) has higher uncertainty
TRUE	255	I18	21/08/2018Swab 4	35		0	> - Late Cp call (last five cycles) has higher uncertainty
TRUE	255	I19	21/08/2018Swab 20	29.92		0
TRUE	255	I20	21/08/2018Swab 20	30.08		0
TRUE	255	I21	21/08/2018Swab 20	29.64		0
TRUE	255	I22	23/08/2018Swab 36	20.67		0
TRUE	255	I23	23/08/2018Swab 36	20.82		0
TRUE	255	I24	23/08/2018Swab 36	20.48		0
TRUE	255	J1	16/08/18NCSwab13	30.58		0
TRUE	255	J2	16/08/18NCSwab13	30.89		0
TRUE	255	J3	16/08/18NCSwab13	30.01		0
TRUE	255	J4	16/08/18Swab9	24.93		0
TRUE	255	J5	16/08/18Swab9	24.93		0
TRUE	255	J6	16/08/18Swab9	23.29		0
TRUE	255	J7	21/08/2018NCSwab 4	35		0	> - Late Cp call (last five cycles) has higher uncertainty
TRUE	255	J8	21/08/2018NCSwab 4	32.9		0
TRUE	255	J9	21/08/2018NCSwab 4	35		0	> - Late Cp call (last five cycles) has higher uncertainty
TRUE	255	J10	21/08/2018NCSwab 20	32.95		0
TRUE	255	J11	21/08/2018NCSwab 20	34.14		0
TRUE	255	J12	21/08/2018NCSwab 20	33.07		0
TRUE	255	J13	23/08/2018NCSwab 36	23.62		0
TRUE	255	J14	23/08/2018NCSwab 36	23.58		0
TRUE	255	J15	23/08/2018NCSwab 36	23.26		0
TRUE	255	J16	21/08/2018Swab 12	22.56		0
TRUE	255	J17	21/08/2018Swab 12	22.55		0
TRUE	255	J18	21/08/2018Swab 12	22.21		0
TRUE	255	J19	23/08/2018Swab 28	23.35		0
TRUE	255	J20	23/08/2018Swab 28	23.18		0
TRUE	255	J21	23/08/2018Swab 28	22.62		0
TRUE	255	J22	0	35		0	> - Late Cp call (last five cycles) has higher uncertainty
TRUE	255	J23	0	35		0	> - Late Cp call (last five cycles) has higher uncertainty
TRUE	255	J24	0	35		0	> - Late Cp call (last five cycles) has higher uncertainty
TRUE	255	K1	16/08/18NCSwab6	32.71		0
TRUE	255	K2	16/08/18NCSwab6	31.84		0
TRUE	255	K3	16/08/18NCSwab6	31.5		0
TRUE	255	K4	16/08/18Swab2	31.02		0
TRUE	255	K5	16/08/18Swab2	30.8		0
TRUE	255	K6	16/08/18Swab2	30.07		0
TRUE	255	K7	16/08/18Swab18	23.73		0
TRUE	255	K8	16/08/18Swab18	24.02		0
TRUE	255	K9	16/08/18Swab18	24.29		0
TRUE	255	K10	21/08/2018NCSwab 13	29.67		0
TRUE	255	K11	21/08/2018NCSwab 13	29.65		0
TRUE	255	K12	21/08/2018NCSwab 13	29.31		0
TRUE	255	K13	23/08/2018NCSwab 29	23.86		0
TRUE	255	K14	23/08/2018NCSwab 29	23.83		0
TRUE	255	K15	23/08/2018NCSwab 29	23.52		0
TRUE	255	K16	21/08/2018Swab 5	30.66		0
TRUE	255	K17	21/08/2018Swab 5	31.92		0
TRUE	255	K18	21/08/2018Swab 5	30.78		0
TRUE	255	K19	23/08/2018Swab 21	32.61		0
TRUE	255	K20	23/08/2018Swab 21	31.8		0
TRUE	255	K21	23/08/2018Swab 21	31.43		0
TRUE	255	K22	23/08/2018Swab 37	20.14		0
TRUE	255	K23	23/08/2018Swab 37	20.32		0
TRUE	255	K24	23/08/2018Swab 37	20.08		0
TRUE	255	L1	16/08/18NCSwab14	28.34		0
TRUE	255	L2	16/08/18NCSwab14	28.46		0
TRUE	255	L3	16/08/18NCSwab14	27.94		0
TRUE	255	L4	16/08/18Swab10	24.49		0
TRUE	255	L5	16/08/18Swab10	24.61		0
TRUE	255	L6	16/08/18Swab10	24.1		0
TRUE	255	L7	21/08/2018NCSwab 5	26.51		0
TRUE	255	L8	21/08/2018NCSwab 5	26.55		0
TRUE	255	L9	21/08/2018NCSwab 5	25.98		0
TRUE	255	L10	23/08/2018NCSwab 21	35		0	> - Late Cp call (last five cycles) has higher uncertainty
TRUE	255	L11	23/08/2018NCSwab 21	33.32		0
TRUE	255	L12	23/08/2018NCSwab 21	35		0	> - Late Cp call (last five cycles) has higher uncertainty
TRUE	255	L13	23/08/2018NCSwab 37	22.58		0
TRUE	255	L14	23/08/2018NCSwab 37	22.89		0
TRUE	255	L15	23/08/2018NCSwab 37	22.13		0
TRUE	255	L16	21/08/2018Swab 13	31.02		0
TRUE	255	L17	21/08/2018Swab 13	30.98		0
TRUE	255	L18	21/08/2018Swab 13	31.15		0
TRUE	255	L19	23/08/2018Swab 29	23.46		0
TRUE	255	L20	23/08/2018Swab 29	23.13		0
TRUE	255	L21	23/08/2018Swab 29	22.54		0
TRUE	255	L22	0	35		0	> - Late Cp call (last five cycles) has higher uncertainty
TRUE	255	L23	0	35		0	> - Late Cp call (last five cycles) has higher uncertainty
TRUE	255	L24	0	35		0	> - Late Cp call (last five cycles) has higher uncertainty
TRUE	255	M1	16/08/18NCSwab7	28.66		0
TRUE	255	M2	16/08/18NCSwab7	28.72		0
TRUE	255	M3	16/08/18NCSwab7	27.65		0
TRUE	255	M4	16/08/18Swab3	29.96		0
TRUE	255	M5	16/08/18Swab3	29.98		0
TRUE	255	M6	16/08/18Swab3	29.86		0
TRUE	255	M7	16/08/18Swab19	23.47		0
TRUE	255	M8	16/08/18Swab19	23.68		0
TRUE	255	M9	16/08/18Swab19	23.09		0
TRUE	255	M10	21/08/2018NCSwab 14	29.8		0
TRUE	255	M11	21/08/2018NCSwab 14	30.71		0
TRUE	255	M12	21/08/2018NCSwab 14	29.98		0
TRUE	255	M13	23/08/2018NCSwab 30	24.3		0
TRUE	255	M14	23/08/2018NCSwab 30	24.42		0
TRUE	255	M15	23/08/2018NCSwab 30	23.77		0
TRUE	255	M16	21/08/2018Swab 6	28.8		0
TRUE	255	M17	21/08/2018Swab 6	29.09		0
TRUE	255	M18	21/08/2018Swab 6	28.54		0
TRUE	255	M19	23/08/2018Swab 22	28.9		0
TRUE	255	M20	23/08/2018Swab 22	28.22		0
TRUE	255	M21	23/08/2018Swab 22	28.49		0
TRUE	255	M22	23/08/2018Swab 38	22.25		0
TRUE	255	M23	23/08/2018Swab 38	22.44		0
TRUE	255	M24	23/08/2018Swab 38	21.99		0
TRUE	255	N1	16/08/18NCSwab15	30		0
TRUE	255	N2	16/08/18NCSwab15	29.96		0
TRUE	255	N3	16/08/18NCSwab15	29.32		0
TRUE	255	N4	16/08/18Swab11	24.22		0
TRUE	255	N5	16/08/18Swab11	24.17		0
TRUE	255	N6	16/08/18Swab11	23.75		0
TRUE	255	N7	21/08/2018NCSwab 6	31.13		0
TRUE	255	N8	21/08/2018NCSwab 6	32.24		0
TRUE	255	N9	21/08/2018NCSwab 6	31.57		0
TRUE	255	N10	23/08/2018NCSwab 22	35		0	> - Late Cp call (last five cycles) has higher uncertainty
TRUE	255	N11	23/08/2018NCSwab 22	34.41		0
TRUE	255	N12	23/08/2018NCSwab 22	35		0	> - Late Cp call (last five cycles) has higher uncertainty
TRUE	255	N13	23/08/2018NCSwab 38	23.12		0
TRUE	255	N14	23/08/2018NCSwab 38	23.24		0
TRUE	255	N15	23/08/2018NCSwab 38	22.61		0
TRUE	255	N16	21/08/2018Swab 14	28.6		0
TRUE	255	N17	21/08/2018Swab 14	28.69		0
TRUE	255	N18	21/08/2018Swab 14	28.07		0
TRUE	255	N19	23/08/2018Swab 30	23.99		0
TRUE	255	N20	23/08/2018Swab 30	23.51		0
TRUE	255	N21	23/08/2018Swab 30	22.89		0
TRUE	255	N22	0	35		0	> - Late Cp call (last five cycles) has higher uncertainty
TRUE	255	N23	0	35		0	> - Late Cp call (last five cycles) has higher uncertainty
TRUE	255	N24	0	35		0	> - Late Cp call (last five cycles) has higher uncertainty
TRUE	255	O1	16/08/18NCSwab8	29.68		0
TRUE	255	O2	16/08/18NCSwab8	29.49		0
TRUE	255	O3	16/08/18NCSwab8	28.74		0
TRUE	255	O4	16/08/18Swab4	27.29		0
TRUE	255	O5	16/08/18Swab4	27.28		0
TRUE	255	O6	16/08/18Swab4	26.78		0
TRUE	255	O7	16/08/18Swab20	24.84		0
TRUE	255	O8	16/08/18Swab20	25.13		0
TRUE	255	O9	16/08/18Swab20	24.32		0
TRUE	255	O10	21/08/2018NCSwab 15	26.77		0
TRUE	255	O11	21/08/2018NCSwab 15	27		0
TRUE	255	O12	21/08/2018NCSwab 15	26.5		0
TRUE	255	O13	23/08/2018NCSwab 31	21.79		0
TRUE	255	O14	23/08/2018NCSwab 31	21.87		0
TRUE	255	O15	23/08/2018NCSwab 31	21.46		0
TRUE	255	O16	21/08/2018Swab 7	29.81		0
TRUE	255	O17	21/08/2018Swab 7	30.03		0
TRUE	255	O18	21/08/2018Swab 7	29.62		0
TRUE	255	O19	23/08/2018Swab 23	28.7		0
TRUE	255	O20	23/08/2018Swab 23	28.1		0
TRUE	255	O21	23/08/2018Swab 23	27.61		0
TRUE	255	O22	23/08/2018Swab 39	20.86		0
TRUE	255	O23	23/08/2018Swab 39	21.09		0
TRUE	255	O24	23/08/2018Swab 39	20.66		0
TRUE	255	P1	16/08/18NCSwab16	29.46		0
TRUE	255	P2	16/08/18NCSwab16	29.13		0
TRUE	255	P3	16/08/18NCSwab16	28.85		0
TRUE	255	P4	16/08/18Swab12	24.06		0
TRUE	255	P5	16/08/18Swab12	23.61		0
TRUE	255	P6	16/08/18Swab12	23.13		0
TRUE	255	P7	21/08/2018NCSwab 7	26.64		0
TRUE	255	P8	21/08/2018NCSwab 7	26.77		0
TRUE	255	P9	21/08/2018NCSwab 7	26.27		0
TRUE	255	P10	23/08/2018NCSwab 23	27.85		0
TRUE	255	P11	23/08/2018NCSwab 23	28.1		0
TRUE	255	P12	23/08/2018NCSwab 23	27.83		0
TRUE	255	P13	23/08/2018NCSwab 39	24.82		0
TRUE	255	P14	23/08/2018NCSwab 39	24.78		0
TRUE	255	P15	23/08/2018NCSwab 39	24.15		0
TRUE	255	P16	21/08/2018Swab 15	26.2		0
TRUE	255	P17	21/08/2018Swab 15	26.1		0
TRUE	255	P18	21/08/2018Swab 15	25.75		0
TRUE	255	P19	23/08/2018Swab 31	20.68		0
TRUE	255	P20	23/08/2018Swab 31	20.51		0
TRUE	255	P21	23/08/2018Swab 31	19.92		0
TRUE	65280	P22	0			0
TRUE	255	P23	0	35		0	> - Late Cp call (last five cycles) has higher uncertainty
TRUE	255	P24	0	35		0	> - Late Cp call (last five cycles) has higher uncertainty
