# Supplementary material for: Evaluation of full-length nanopore 16S sequencing for detection of pathogens in microbial keratitis
Source: PeerJ journal article supplement (doi:10.7717/peerj.10778), 2021-02-15

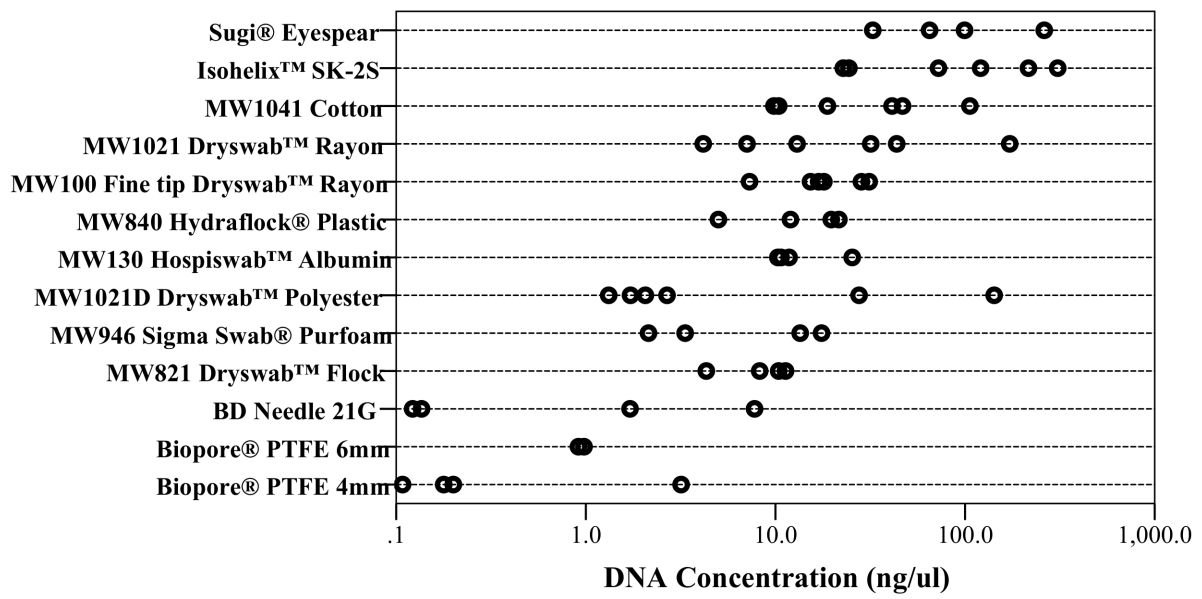

Supplement: Supplementary_Figure_3_v2.pdf [file Supplementary_Figure_3_v2.pdf]
